# Supplementary material for: Pregnancy by Assisted Reproductive Technology Is Associated with Shorter Telomere Length in Neonates
Source: PubMed Central journal article supplement (PMC7766074; doi:10.3390/ijms21249688), 2020-12-18
Supplement: ijms-21-09688-s001.pdf [file ijms-21-09688-s001.pdf]

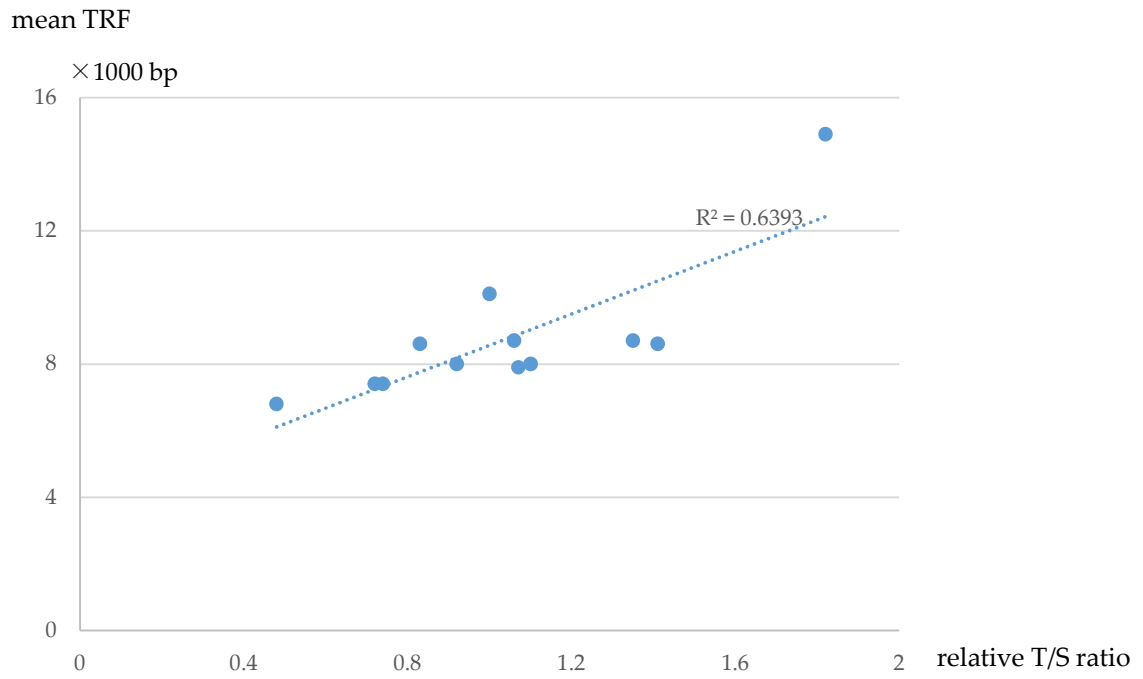

Correlation between the T/S ratio and TRF

Figure. S1. Correlation between the relative telomere length to single-copy gene (T/S) ratio determined by quantitative PCR and mean telomeric restriction fragment (TRF) length determined by Southern blot analysis using DNA samples prepared from neonatal cord blood.

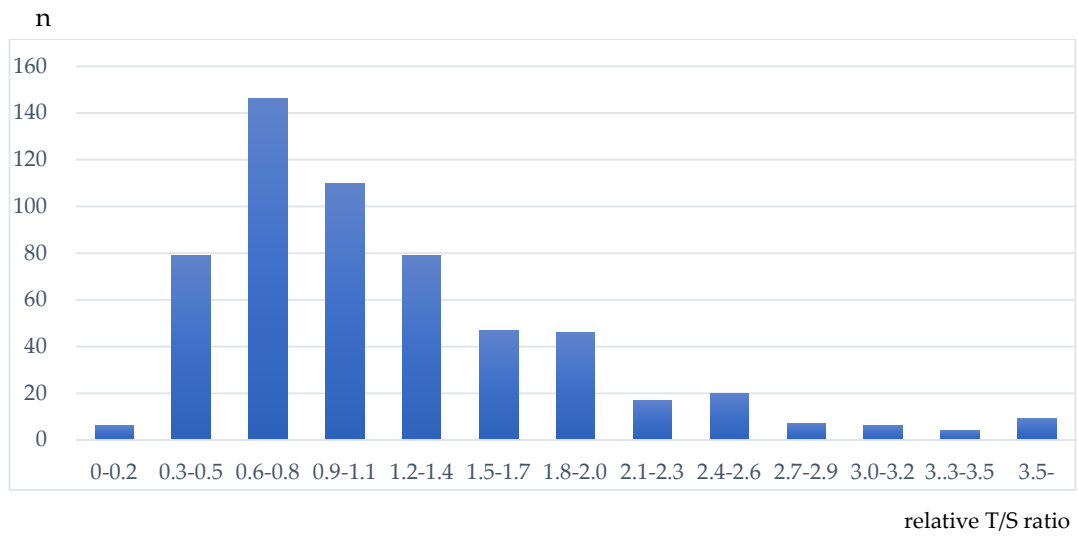

Figure . S2. Distribution of neonatal telomere length. T/S ratio: telomere length to single-copy gene ratio.
